# Supplementary material for: Enhanced Sensitivity of MoTe2 Chemical Sensor through Light Illumination
Source: Micromachines (Basel). 2017 May 12;8(5):155. doi: 10.3390/mi8050155 (PMC6189933; doi:10.3390/mi8050155)
Supplement: Supplementary file 1 [file micromachines-08-00155-s001.pdf]

# Supplementary Materials: Enhanced Sensitivity of MoTe<sub>2</sub> Chemical Sensor through Light Illumination

Zhihong Feng, Yuan Xie, Enxiu Wu, Yuanyuan Yu, Shijun Zheng, Rui Zhang, Xuejiao Chen, Chonglin Sun, Hao Zhang, Wei Pang, Jing Liu, and Daihua Zhang

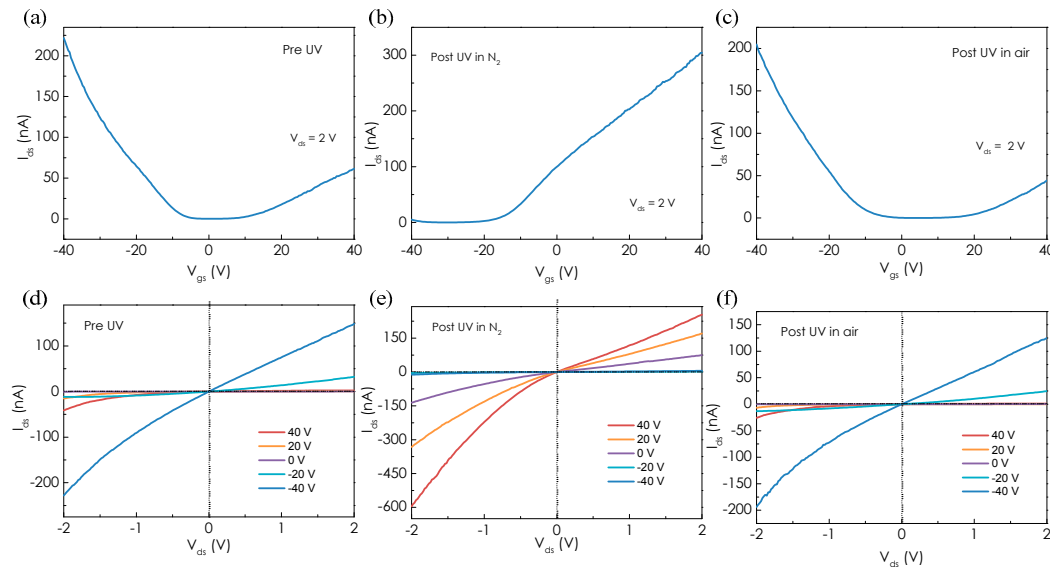

**Figure S1.** Transfer characteristics of MoTe<sub>2</sub> FET (a) before and (b) after UV illumination and (c) after recovery in air. (d–f) Corresponding output characteristics in (a–c).

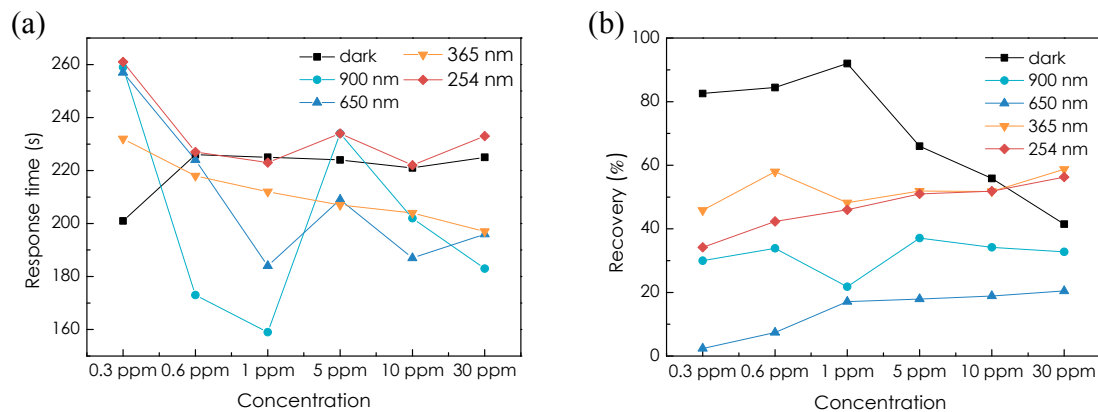

**Figure S2.** (a) Response time of the MoTe<sub>2</sub> sensor under different condition. (b) Recovery of the MoTe<sub>2</sub> sensor under different condition. The response time was defined as the time required to change the conductance after exposure of NH<sub>3</sub> in a specific range of 90%. The recovery was defined as  $(G - G_{10min}) / (G - G_0) \times 100\%$ , where  $G_0$  and  $G$  are the initial conductance and 5 min after NH<sub>3</sub> exposure, respectively,  $G_{10min}$  is the device conductance after shutting off the target gas for 10 min.
